# Supplementary material
Source: Elsevier journal article supplement (https://www.sciencedirect.com/science/article/pii/S217357272200234X)
Supplement: mmc1 [file S217357272200234X:mmc1.pdf]

## Plasmaféresis en UCI en la Comunidad de Madrid

Querido compañero,

La plasmaféresis (intercambio terapéutico del plasma) es una técnica de la que se pueden beneficiar algunos pacientes críticos y muchos no críticos (neurrológicos, nefrológicos, hematológicos, con enfermedades autoinmunes...).

Desde hace tiempo esta terapia se puede realizar en nuestras unidades de forma fácil y segura con los monitores habituales de terapia renal sustitutiva continua y el personal de cuidados intensivos adecuadamente entrenado.

Te presentamos una breve encuesta para ver el grado de implantación en las UCI de la Comunidad de Madrid de la plasmaféresis terapéutica. Muchas gracias por tu participación.

---

### \*Obligatorio

1. Nombre del Hospital \*

---

2. Número de camas del Hospital \*

---

3. Número de camas de UCI \*

---

### Plasmaféresis fuera de UCI

4. ¿Se hace plasmaféresis (intercambio terapéutico de plasma) en tu hospital fuera de la UCI? \*

*Marca solo un óvalo.*

Sí

No

5. Si la respuesta anterior es afirmativa, ¿qué servicio la lleva a cabo? \*

*Marca solo un óvalo.*

- Hematología
- Nefrología
- Otro servicio
- No procede (no se realiza plasmaféresis en mi hospital)

#### Plasmaféresis en UCI

6. ¿Se hace plasmaféresis en tu UCI? \*

*Marca solo un óvalo.*

- Sí
- No

7. Si la respuesta anterior es afirmativa, ¿quién la realiza? \*

*Selecciona todos los que correspondan.*

- Profesionales de UCI
- Profesionales de Nefrología
- Profesionales de Hematología
- Otro: \_\_\_\_\_

8. Los pacientes a los que se realiza en UCI la plasmaféresis, ¿de dónde provienen? (marcar todo lo que proceda) \*

*Selecciona todos los que correspondan.*

- Planta de Hospitalización
- Domicilio (indicado desde consultas externas)
- Pacientes críticos ingresados en UCI

9. ¿En qué horario es posible realizar la plasmaféresis en UCI? \*

*Marca solo un óvalo.*

- Solo días laborables en horario de mañana
- Solo días laborables a cualquier hora
- Cualquier día de la semana (incluyendo festivos) en horario de mañana
- Los 365 días del año a cualquier hora

10. ¿Cual es la marca del monitor que utilizáis para la plasmaféresis? \*

\_\_\_\_\_

11. Existe en tu UCI un equipo médico y de enfermería específico para la plasmaféresis? \*

*Marca solo un óvalo.*

- Sí, solo la saben realizar un grupo reducido de médicos y enfermeras
- No, la sabe y puede realizar cualquier médico y cualquier enfermera

12. ¿Cuántos pacientes aproximadamente de media se tratan cada año? \*

\_\_\_\_\_

13. ¿Cuál es el número de terapias aproximado que se realiza cada año? \*

\_\_\_\_\_
